# Supplementary material for: An enzyme-free glucose sensor based on a difunctional diboronic acid for molecular recognition and potentiometric transduction
Source: Royal Society of Chemistry journal article supplement (doi:10.1039/c4ra15037f), 2015-01-01
Supplement: c4ra15037f1.pdf [file c4ra15037f1.pdf]

## Supporting Information

An enzyme-free glucose sensor based on a difunctional diboronic acid for  
molecular recognition and potentiometric transduction

*Hongduo Chen,<sup>a, b, d</sup> Long Li,<sup>b, c, d</sup> Huimin Guo,<sup>\*a</sup> Xuwei Wang<sup>b, c</sup> and Wei Qin<sup>\*b</sup>*

<sup>a</sup> State Key Laboratory of Fine Chemicals, College of Chemistry, Dalian University of Technology, Dalian 116024, China.

<sup>b</sup> Key Laboratory of Coastal Environmental Processes and Ecological Remediation, Yantai Institute of Coastal Zone Research (YIC), Chinese Academy of Sciences (CAS); Shandong Provincial Key Laboratory of Coastal Environmental Processes, YICCAS, Yantai, Shandong 264003, P. R. China.

<sup>c</sup> University of Chinese Academy of Sciences, Beijing 100049, P. R. China.

<sup>d</sup> These authors contributed equally to this article.

\* Corresponding author. Tel.: +86 535 2109156; E-mail address: [wqin@yic.ac.cn](mailto:wqin@yic.ac.cn).

### Reagents and materials

Tetradodecylammonium chloride (TDDA<sup>+</sup>Cl<sup>-</sup>), *o*-nitrophenyl octylether (*o*-NPOE), high molecular weight poly(vinyl chloride) (PVC), 2-formylbenzeneboronic acid, 3,3'-diaminodiphenylmethane, glucose, fructose, galactose, sodium borohydride and tetrahydrofuran (THF) were purchased from Sigma-Aldrich. Solvents were purified before being used for synthesis. Aqueous solutions were prepared with freshly deionized water (18.2 MΩ specific resistance) obtained with a Pall Cascada laboratory water system. NMR spectra were taken on a Bruker Avance III 500 NMR spectrometer and Mass spectra were recorded with a Q-TOF Micro MS spectrometer.

### Synthesis and characterization of the DBA

The DBA was synthesized as described before.<sup>1</sup> 2-Formylbenzeneboronic acid (300 mg, 2 mmol) was slowly added to a solution of 3,3'-diaminodiphenylmethane (198 mg, 1 mmol) in methanol (10 mL). The yellow solution was stirred at room temperature for 2 h before it was heated at 50 °C for 24 h. Then the mixture was cooled to 0 °C and sodium borohydride (380

mg, 10 mmol) was slowly added in small portions. The reaction mixture was stirred at room temperature for another 3 h before the solvent was removed under vacuum. After that, brine (30 mL) was added dropwise to the residue to obtain a white cloudy mixture. Then the pH value was adjusted to 7-8 with hydrochloric acid (10 %). The precipitated white solid was collected by filtration and washed successively with water. The solid was dried further under vacuum without further purification (242 mg, 52%). <sup>1</sup>H NMR (500 MHz, CD<sub>3</sub>OD): δ 3.74 (s, 2H, Ph-CH<sub>2</sub>-Ph), 4.29 (s, 4H, Ph-CH<sub>2</sub>-NH-Ph), 6.53-6.67 (m, 6H, ArH), 7.01-7.03 (t, 2H, ArH), 7.16-7.42 (m, 8H, ArH); <sup>13</sup>C NMR (75 MHz, CD<sub>3</sub>OD): δ 148.86, 145.20, 143.43, 133.12, 129.96, 129.80, 129.45, 128.56, 127.46, 121.55, 117.37, 114.49, 51.28, 43.07; HRMS (ESI-TOF, m/z): [M-2H<sub>2</sub>O-H]<sup>-</sup> calcd for C<sub>27</sub>H<sub>24</sub>B<sub>2</sub>N<sub>2</sub>O<sub>2</sub><sup>-</sup>, 429.1946; found 429.1959.

### Membrane preparation and EMF measurements

Polymeric liquid membranes containing PVC and *o*-NPOE in a weight ratio of 1:1 and TDDA<sup>+</sup>Cl<sup>-</sup> (10 mM/kg) were prepared by the solvent-casting method.<sup>2</sup> After transferring the mixture into a glass ring (i.d. 50 mm) fixed on a glass plate and letting THF evaporate overnight, a uniform membrane was obtained. For each membrane, a disk of 5 mm diameter was punched from the membrane and glued to a plasticized PVC tube (i.d 3 mm, o.d. 5 mm) with THF/PVC slurry. 10 mM KCl was used as the inner filling medium for the electrode.

All measurements of electromotive force (E) were carried out at 25 ± 2 °C using a PXSJ-216 pH meter (Shanghai, China) in the following galvanic cell in a Faraday cage: Ag, AgCl/3 M KCl/1 M LiOAc/sample solution (well-stirred, 1500 rpm)/sensing membrane/10 mM KCl/AgCl, Ag.

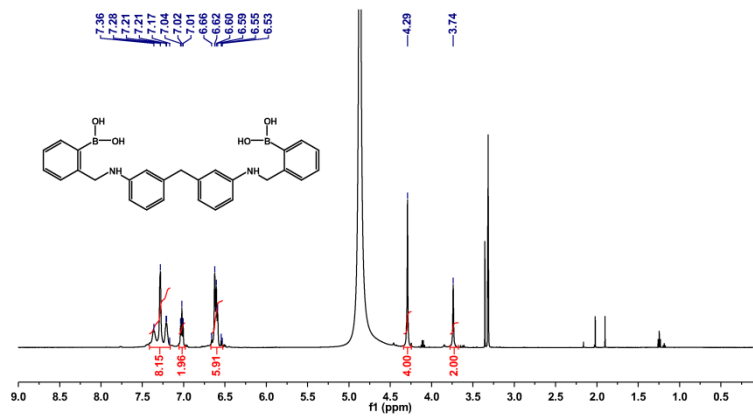

**Figure S1** <sup>1</sup>H NMR spectrum of the DBA (CD<sub>3</sub>OD, 500MHz).

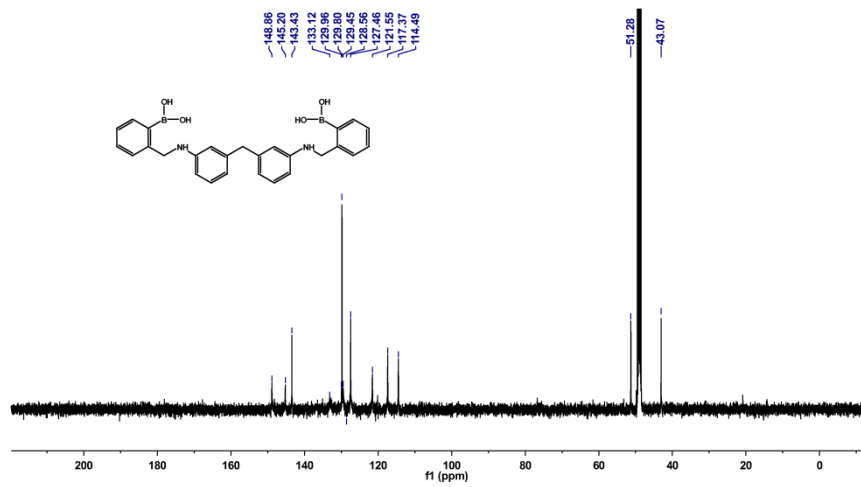

**Figure S2**  $^{13}\text{C}$  NMR spectrum of the DBA ( $\text{CD}_3\text{OD}$ , 75MHz).

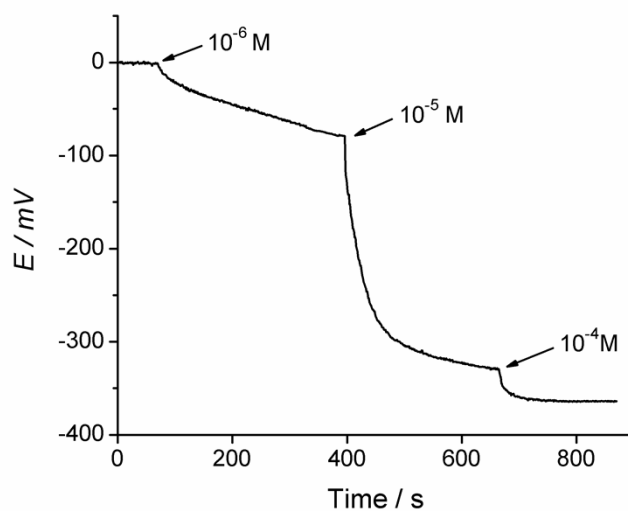

**Figure S3** Potential responses to the DBA at different concentrations measured with the TDDA<sup>+</sup>Cl<sup>-</sup>-doped PLME in 50 mM phosphate buffer (pH 8.0).

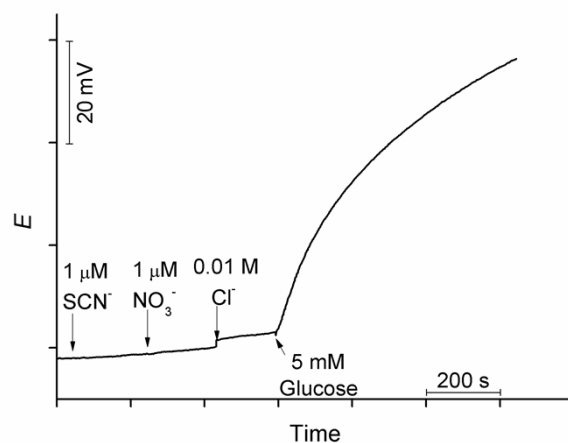

**Figure S4** Potential responses to 1  $\mu\text{M}$   $\text{SCN}^-$ , 1  $\mu\text{M}$   $\text{NO}_3^-$ , 0.01 M  $\text{Cl}^-$  and 5 mM glucose on the TDDA<sup>+</sup>Cl<sup>-</sup>-doped PLME. Conditions: 10<sup>-5</sup> M DBA in 50 mM phosphate buffer (pH 8.0).

## References

1. S. Arimori, L. I. Bosch, C. J. Ward and T. D. James, *Tetrahedron Lett.*, 2002, **43**, 911.
2. X. W. Wang, D. F. Yue, E. G. Lv, L. Wu and W. Qin, *Anal. Chem.*, 2014, **86**, 1927-1931.
